# Supplementary material
Source: PubMed Central journal article supplement (PMC5970001)

## Anxiety behaviors (Plus maze test)

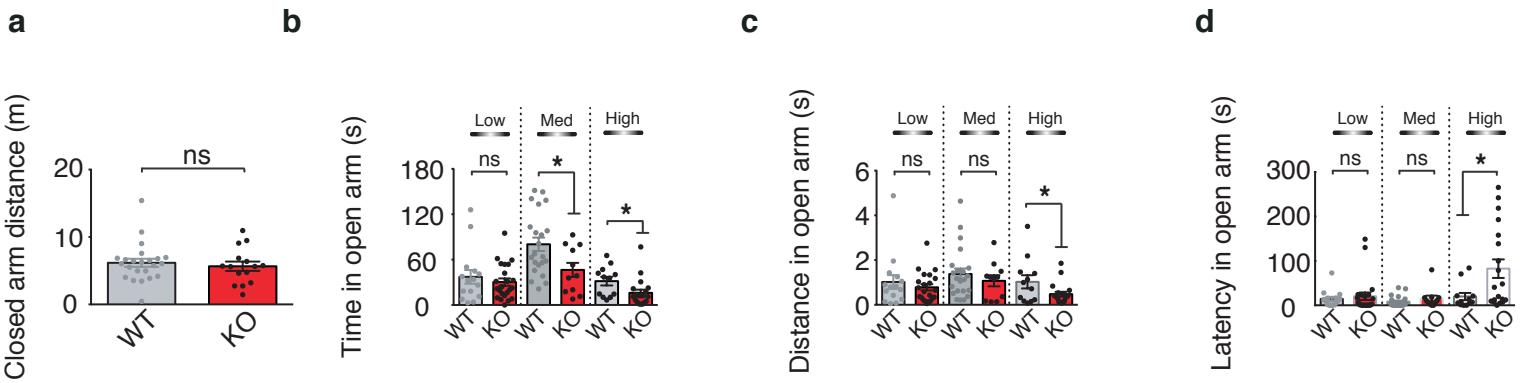

## Anxiety behaviors (Open field test)

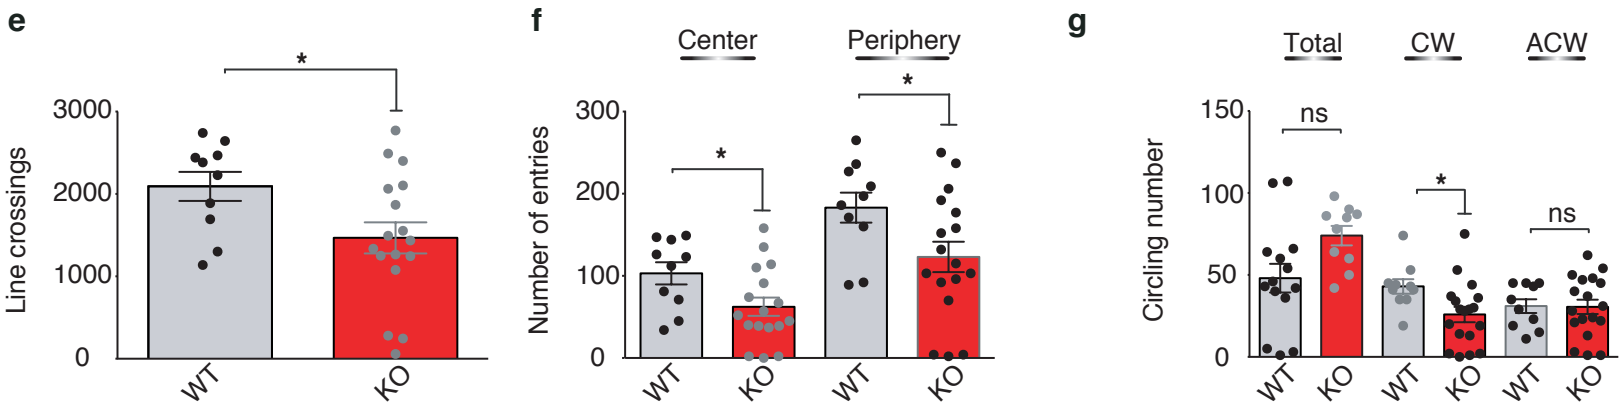

## Anxiety and Social behaviors

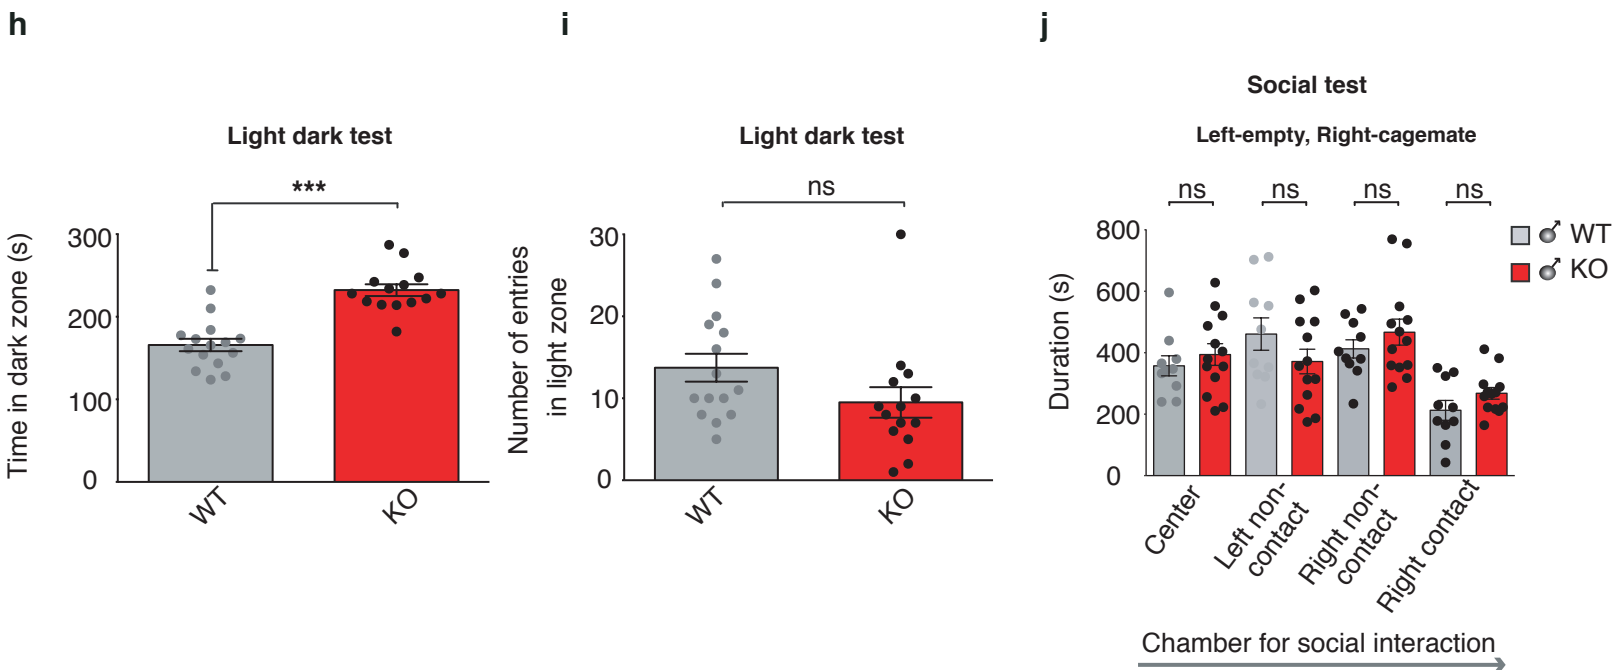

Supplement: NIHMS889964-supplement-6.pdf [file NIHMS889964-supplement-6.pdf]
