# Supplementary material
Source: PubMed Central journal article supplement (PMC5970001)

a

## Grooming behavior

## Grooming test

Fluoxetine

1 day

1 week

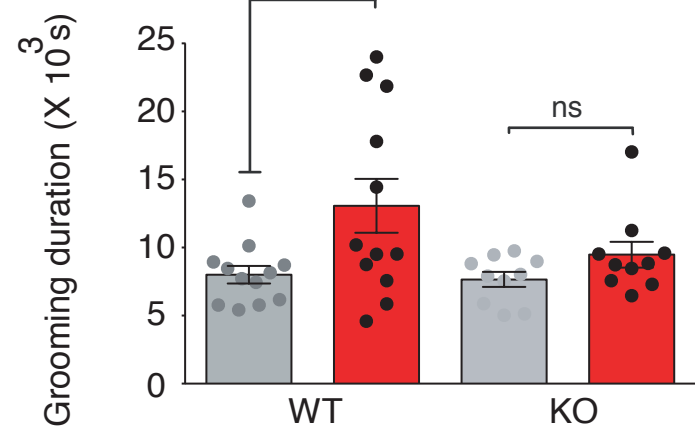

b

## Anxiety behavior

## Open field test

Vehicle

Fluoxetine (13 weeks)

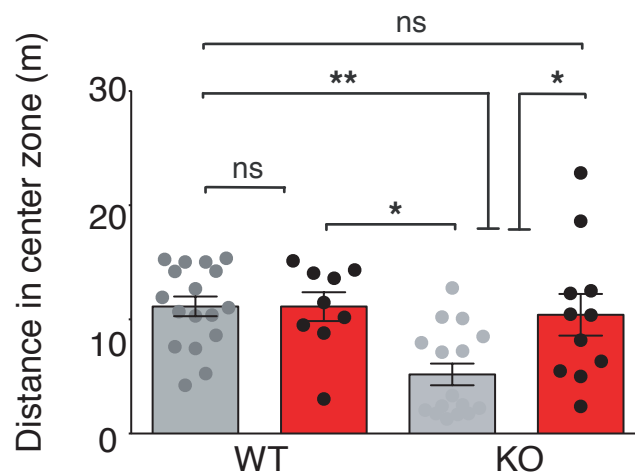

← Anxiety behaviors →

c

## Open field test

Vehicle

Fluoxetine (13 weeks)

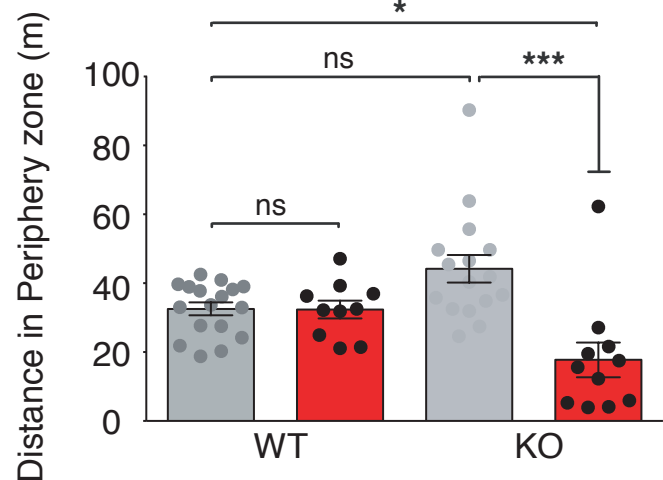

d

## Light-dark test

Vehicle

Fluoxetine (13 weeks)

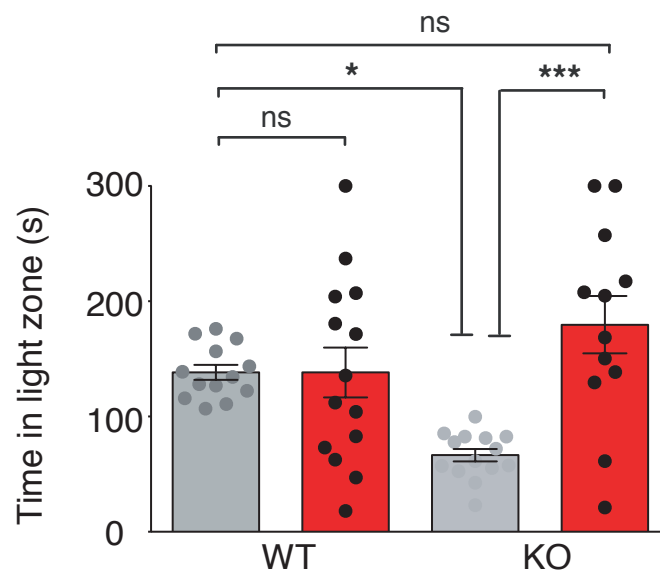

Supplement: NIHMS889964-supplement-7.pdf [file NIHMS889964-supplement-7.pdf]
