# Supplementary material
Source: PubMed Central journal article supplement (PMC5970001)
Supplement: NIHMS889964-supplement-9.pdf [file NIHMS889964-supplement-9.pdf]

Statistical summary of synaptic parameters characterized in *Hoxb8* mutant mice

a

| Cortex        | Age (mths)            | Parameters analyzed | Synapse type, Genotype and 'n' |                     |                    |                      |                      |                     |        |        | Statistical test                      |
|---------------|-----------------------|---------------------|--------------------------------|---------------------|--------------------|----------------------|----------------------|---------------------|--------|--------|---------------------------------------|
|               |                       |                     | Asymmetric                     |                     |                    |                      | Symmetric            |                     |        |        |                                       |
|               |                       |                     | WT                             | <i>Hoxb8</i> mutant | P                  | Figure               | WT                   | <i>Hoxb8</i> mutant | P      | Figure |                                       |
| 8 months      |                       |                     | Mean ± SEM, n                  | Mean ± SEM, n       |                    |                      | Mean ± SEM, n        | Mean ± SEM, n       |        |        | One-way ANOVA<br>Tukey's posthoc test |
|               | Presynaptic diameter  | 444 ± 8.4 (n= 250)  | 493 ± 7.1 (n= 250)             | <0.0001*            | Sup 3j             | 513 ± 6.9 (n= 250)   | 538 ± 7.2 (n= 250)   | 0.0102*             | Sup 3j |        |                                       |
|               | Postsynaptic diameter | 375 ± 5.7 (n= 250)  | 418 ± 5.4 (n= 250)             | 0.00171             | Sup 3l             | 510 ± 6.7 (n= 250)   | 499 ± 5.6 (n= 250)   | 0.1842              | Sup 3l |        |                                       |
|               | Synaptic length       | 373 ± 5.8 (n= 250)  | 403 ± 5.2 (n= 250)             | 0.00012             | 1e                 | 441 ± 5.3 (n= 250)   | 475 ± 5.5 (n= 250)   | <0.0001*            | 1e     |        |                                       |
|               | Active zone length    | 248 ± 3.3 (n= 250)  | 321 ± 3.7 (n= 250)             | <0.0001*            | Sup 2i             | 345 ± 4.2 (n= 250)   | 406 ± 4.9 (n= 250)   | <0.0001*            | Sup 2i |        |                                       |
|               | Active zone thickness | 21 ± 0.17 (n= 250)  | 21 ± 0.17 (n= 250)             | 0.54393             | Sup 2k             | 20.5 ± 0.15 (n= 250) | 20.9 ± 0.15 (n= 250) | 0.07734             | Sup 2k |        |                                       |
|               | PSD length            | 295 ± 3.6 (n= 250)  | 344 ± 3.5 (n= 250)             | <0.0001*            | 1o                 | 340 ± 3.8 (n= 250)   | 389 ± 5.6 (n= 250)   | <0.0001*            | 1o     |        |                                       |
| PSD thickness | 65 ± 0.64 (n= 250)    | 51 ± 0.63 (n= 250)  | <0.0001*                       | 1q                  | 58 ± 0.53 (n= 250) | 56 ± 0.82 (n= 250)   | 0.014*               | 1q                  |        |        |                                       |

b

| Striatum      | Age (mths)            | Parameters analyzed | Synapse type, Genotype and 'n' |                     |                   |                    |                    |                     |        |        | Statistical test                      |
|---------------|-----------------------|---------------------|--------------------------------|---------------------|-------------------|--------------------|--------------------|---------------------|--------|--------|---------------------------------------|
|               |                       |                     | Asymmetric                     |                     |                   |                    | Symmetric          |                     |        |        |                                       |
|               |                       |                     | WT                             | <i>Hoxb8</i> mutant | P                 | Figure             | WT                 | <i>Hoxb8</i> mutant | P      | Figure |                                       |
| 8 months      |                       |                     | Mean ± SEM, n                  | Mean ± SEM, n       |                   |                    | Mean ± SEM, n      | Mean ± SEM, n       |        |        | One-way ANOVA<br>Tukey's posthoc test |
|               | Presynaptic diameter  | 548 ± 9.8 (n= 250)  | 369 ± 8.0 (n= 250)             | <0.0001*            | Sup 3k            | 547 ± 7.9 (n= 250) | 454 ± 7.7 (n= 250) | <0.0001*            | Sup 3k |        |                                       |
|               | Postsynaptic diameter | 425 ± 8.6 (n= 250)  | 324 ± 6.9 (n= 250)             | <0.0001*            | Sup 3m            | 495 ± 6.4 (n= 250) | 449 ± 6.9 (n= 250) | <0.0001*            | Sup 3m |        |                                       |
|               | Synapse length        | 483 ± 6.2 (n= 250)  | 433 ± 5.4 (n= 250)             | <0.0001*            | 1f                | 491 ± 7 (n= 250)   | 437 ± 5.8 (n= 250) | <0.0001*            | 1f     |        |                                       |
|               | Active zone length    | 323 ± 6.6 (n= 250)  | 228 ± 4.7 (n= 250)             | <0.0001*            | Sup 2j            | 398 ± 5.6 (n= 250) | 352 ± 5.3 (n= 250) | <0.0001*            | Sup 2j |        |                                       |
|               | Active zone thickness | 21 ± 0.17 (n= 250)  | 21 ± 0.22 (n= 250)             | <0.0001*            | Sup 2l            | 20 ± 0.15 (n= 250) | 21 ± 0.16 (n= 250) | <0.0001*            | Sup 2l |        |                                       |
|               | PSD length            | 282 ± 4.1 (n= 250)  | 254 ± 4.1 (n= 250)             | <0.0001*            | 1p                | 371 ± 4.2 (n= 250) | 346 ± 4.2 (n= 250) | <0.0001*            | 1p     |        |                                       |
| PSD thickness | 60 ± 0.6 (n= 250)     | 54 ± 0.9 (n= 250)   | <0.0001*                       | 1r                  | 55 ± 0.6 (n= 250) | 60 ± 1 (n= 250)    | <0.0001*           | 1r                  |        |        |                                       |

c

| Age (mths) | Parameters analyzed   | Cortex             |                    | Striatum           |                    |
|------------|-----------------------|--------------------|--------------------|--------------------|--------------------|
|            |                       | Asymmetric         | Symmetric          | Asymmetric         | Symmetric          |
|            |                       | <i>Hoxb8</i> Vs WT | <i>Hoxb8</i> Vs WT | <i>Hoxb8</i> Vs WT | <i>Hoxb8</i> Vs WT |
| 8 months   | Presynaptic diameter  | ↗                  | ↗                  | ↘                  | ↘                  |
|            | Postsynaptic diameter | ↗                  | ↔                  | ↘                  | ↘                  |
|            | Synapse length        | ↗                  | ↗                  | ↘                  | ↘                  |
|            | Active zone length    | ↗                  | ↗                  | ↘                  | ↘                  |
|            | Active zone thickness | ↔                  | ↔                  | ↘                  | ↗                  |
|            | PSD length            | ↗                  | ↗                  | ↘                  | ↘                  |
|            | PSD thickness         | ↘                  | ↘                  | ↗                  | ↗                  |

c1

| Age (mths)    | Parameters analyzed   | P values for Paired two-tailed t test |                    |                    |                    |
|---------------|-----------------------|---------------------------------------|--------------------|--------------------|--------------------|
|               |                       | Cortex                                |                    | Striatum           |                    |
|               |                       | Asymmetric                            | Symmetric          | Asymmetric         | Symmetric          |
| 8 months      |                       | <i>Hoxb8</i> Vs WT                    | <i>Hoxb8</i> Vs WT | <i>Hoxb8</i> Vs WT | <i>Hoxb8</i> Vs WT |
|               | Presynaptic diameter  | <0.0001*                              | <0.0001*           | <0.0001*           | <0.0001*           |
|               | Postsynaptic diameter | <0.0001*                              | <0.0001*           | 0.1573             | <0.0001*           |
|               | Synapse length        | <0.0001*                              | <0.0001*           | <0.0001*           | <0.0001*           |
|               | Active zone length    | <0.0001*                              | <0.0001*           | <0.0001*           | <0.0001*           |
|               | Active zone thickness | <0.0001*                              | 0.0717*            | <0.0001*           | <0.0001*           |
|               | PSD length            | <0.0001*                              | <0.0001*           | <0.0001*           | 0.0002*            |
| PSD thickness | <0.0001*              | 0.0078*                               | <0.0001*           | <0.0001*           |                    |

d

| Age (mths)      | Parameters analyzed       | Cortex          |                 | Cortex          |                 | Cortex          |                 | Cortex          |                 |
|-----------------|---------------------------|-----------------|-----------------|-----------------|-----------------|-----------------|-----------------|-----------------|-----------------|
|                 |                           | <i>Hoxb8</i> WT | <i>Hoxb8</i> KO |
|                 |                           | Mouse # 1       | Mouse # 1       | Mouse # 2       | Mouse # 2       | Mouse # 3       | Mouse # 3       | Mouse # 3       | Mouse # 3       |
| 8 months        | Total neurons (#)         | 11              | 12              | 13              | 15              | 11              | 14              |                 |                 |
|                 | Slices analyzed (#)       | 5               | 5               | 5               | 5               | 5               | 5               |                 |                 |
|                 | Total dendrites (#)       | 21              | 25              | 26              | 26              | 21              | 26              |                 |                 |
|                 | Mean ± SEM (Spines/10 μm) | 5.74 ± 0.47     | 7.38 ± 0.52     | 7.97 ± 0.3      | 10.8 ± 1.0      | 7.54 ± 0.78     | 9.57 ± 0.49     |                 |                 |
|                 | P value (T-test)          |                 | 0.0251          |                 | 0.012           |                 | 0.03            |                 |                 |
|                 | F probability (T-test)    |                 | 0.4138          |                 | < 0.0001        |                 | 0.09            |                 |                 |
|                 | P value (ANOVA)           |                 | 0.0273          |                 | 0.01            |                 | 0.027           |                 |                 |
| F value (ANOVA) |                           | 5.207           |                 | 7.141           |                 | 5.196           |                 |                 |                 |

e

| Age (mths)      | Parameters analyzed       | Striatum        |                 | Striatum        |                 | Striatum        |                 | Striatum        |                 |
|-----------------|---------------------------|-----------------|-----------------|-----------------|-----------------|-----------------|-----------------|-----------------|-----------------|
|                 |                           | <i>Hoxb8</i> WT | <i>Hoxb8</i> KO |
|                 |                           | Mouse # 1       | Mouse # 1       | Mouse # 2       | Mouse # 2       | Mouse # 3       | Mouse # 3       | Mouse # 3       | Mouse # 3       |
| 8 months        | Total neurons (#)         | 5               | 5               | 5               | 6               | 3               | 7               |                 |                 |
|                 | Slices analyzed (#)       | 3               | 4               | 3               | 4               | 3               | 4               |                 |                 |
|                 | Total dendrites (#)       | 15              | 15              | 16              | 16              | 13              | 12              |                 |                 |
|                 | Mean ± SEM (Spines/10 μm) | 8.17 ± 0.52     | 6.09 ± 0.36     | 7.99 ± 0.68     | 7.29 ± 0.48     | 8.82 ± 0.62     | 6.92 ± 0.54     |                 |                 |
|                 | P value (T-test)          |                 | 0.003           |                 | 0.4062          |                 | 0.032           |                 |                 |
|                 | F probability (T-test)    |                 | 0.2076          |                 | 0.1903          |                 | 0.4931          |                 |                 |
|                 | P value (ANOVA)           |                 | 0.0029          |                 | 0.4054          |                 | 0.0359          |                 |                 |
| F value (ANOVA) |                           | 10.65           |                 | 0.711           |                 | 4.9948          |                 |                 |                 |

f

| Age (mths) | Parameters analyzed (Total) | Dendritic spine analysis |                 |
|------------|-----------------------------|--------------------------|-----------------|
|            |                             | Cortex                   | Cortex          |
|            |                             | <i>Hoxb8</i> WT          | <i>Hoxb8</i> KO |
| 8 months   | Mice                        | 3                        | 3               |
|            | Slices                      | 15                       | 15              |
|            | Neurons                     | 21                       | 22              |
|            | Dendrites                   | 68                       | 77              |

  

| Age (mths) | Parameters analyzed (Total) | Striatum        |                 |
|------------|-----------------------------|-----------------|-----------------|
|            |                             | <i>Hoxb8</i> WT | <i>Hoxb8</i> KO |
|            |                             | 8 months        | Mice            |
| Slices     | 10                          |                 | 12              |
| Neurons    | 13                          |                 | 18              |
| Dendrites  | 44                          |                 | 43              |
