# Supplementary material
Source: PubMed Central journal article supplement (PMC5970001)
Supplement: NIHMS889964-supplement-10.pdf [file NIHMS889964-supplement-10.pdf]

Supplementary Table 2 EM analysis statistics per mouse brain tissue

| Genotypes      | Synaptic parameters analyzed   | Brain area analyzed | Synapse type | Mouse tissue # | Synapses analyzed per tissue N | Statistical tests and significance | Posthoc test     | P Value | F value    | Data used for Figure | Statistical tests and significance (Grouped)         | P Value  | rs value  | Statistical tests and significance (Grouped) | P Value  | R squared | Correlation coefficient | t value | df value |
|----------------|--------------------------------|---------------------|--------------|----------------|--------------------------------|------------------------------------|------------------|---------|------------|----------------------|------------------------------------------------------|----------|-----------|----------------------------------------------|----------|-----------|-------------------------|---------|----------|
| WT<br>Hoxb8 KO | WT vs KO Presynaptic diameter  | Frontal cortex      | Asymmetric   | 1              | 1                              | 90 One-way ANOVA                   | Tukey's HSD test | <.0001  | 542.01525  | Sup 3j               | Wilcoxon-matched pairs signed rank two-tailed t test | < 0.0001 | -0.3675   | Paired t test (Two-tailed)                   | < 0.0001 | 0.02032   | -0.3165                 | 3.949   | 752      |
|                |                                |                     | Symmetric    | 1              | 1                              | 90 One-way ANOVA                   | Tukey's HSD test | <.0001  | 18.117616  | Sup 3j               |                                                      |          |           |                                              |          |           |                         |         |          |
|                |                                |                     | Asymmetric   | 2              | 2                              | 80 One-way ANOVA                   | Tukey's HSD test | 0.00141 | 10.313503  | Sup 3j               |                                                      |          |           |                                              |          |           |                         |         |          |
| WT<br>Hoxb8 KO | WT vs KO Presynaptic diameter  | Frontal cortex      | Asymmetric   | 1              | 1                              | 90 One-way ANOVA                   | Tukey's HSD test | 0.00221 | 9.4552685  | Sup 3j               | Wilcoxon-matched pairs signed rank two-tailed t test | < 0.0001 | 0.2073    | Paired t test (Two-tailed)                   | < 0.0001 | 0.01092   | 0.1896                  | 2.882   | 752      |
|                |                                |                     | Symmetric    | 1              | 1                              | 90 One-way ANOVA                   | Tukey's HSD test | <.0001  | 18.117616  | Sup 3j               |                                                      |          |           |                                              |          |           |                         |         |          |
|                |                                |                     | Asymmetric   | 2              | 2                              | 80 One-way ANOVA                   | Tukey's HSD test | 0.00141 | 10.313503  | Sup 3j               |                                                      |          |           |                                              |          |           |                         |         |          |
| WT<br>Hoxb8 KO | WT vs KO Presynaptic diameter  | Striatum            | Asymmetric   | 1              | 1                              | 90 One-way ANOVA                   | Tukey's HSD test | 0.00489 | 7.9863869  | Sup 3k               | Wilcoxon-matched pairs signed rank two-tailed t test | < 0.0001 | -0.1418   | Paired t test (Two-tailed)                   | < 0.0001 | 0.1949    | -0.1236                 | 13.48   | 751      |
|                |                                |                     | Symmetric    | 1              | 1                              | 90 One-way ANOVA                   | Tukey's HSD test | <.0001  | 370.66291  | Sup 3k               |                                                      |          |           |                                              |          |           |                         |         |          |
|                |                                |                     | Asymmetric   | 2              | 2                              | 80 One-way ANOVA                   | Tukey's HSD test | <.0001  | 204.76231  | Sup 3k               |                                                      |          |           |                                              |          |           |                         |         |          |
| WT<br>Hoxb8 KO | WT vs KO Presynaptic diameter  | Striatum            | Asymmetric   | 1              | 1                              | 90 One-way ANOVA                   | Tukey's HSD test | 0.45012 | 0.57117646 | Sup 3k               | Wilcoxon-matched pairs signed rank two-tailed t test | < 0.0001 | 0.133     | Paired t test (Two-tailed)                   | < 0.0001 | 0.09407   | 0.09065                 | 8.819   | 749      |
|                |                                |                     | Symmetric    | 1              | 1                              | 90 One-way ANOVA                   | Tukey's HSD test | <.0001  | 89.347136  | Sup 3k               |                                                      |          |           |                                              |          |           |                         |         |          |
|                |                                |                     | Asymmetric   | 2              | 2                              | 80 One-way ANOVA                   | Tukey's HSD test | <.0001  | 66.520999  | Sup 3k               |                                                      |          |           |                                              |          |           |                         |         |          |
| WT<br>Hoxb8 KO | WT vs KO Postsynaptic diameter | Frontal cortex      | Asymmetric   | 1              | 1                              | 90 One-way ANOVA                   | Tukey's HSD test | <.0001  | 163.64641  | Sup 3j               | Wilcoxon-matched pairs signed rank two-tailed t test | < 0.0001 | -0.07886  | Paired t test (Two-tailed)                   | < 0.0001 | 0.03771   | -0.02445                | 5.429   | 752      |
|                |                                |                     | Symmetric    | 1              | 1                              | 90 One-way ANOVA                   | Tukey's HSD test | 0.04169 | 4.170079   | Sup 3j               |                                                      |          |           |                                              |          |           |                         |         |          |
|                |                                |                     | Asymmetric   | 2              | 2                              | 80 One-way ANOVA                   | Tukey's HSD test | 0.01388 | 6.0983753  | Sup 3j               |                                                      |          |           |                                              |          |           |                         |         |          |
| WT<br>Hoxb8 KO | WT vs KO Postsynaptic diameter | Frontal cortex      | Asymmetric   | 1              | 1                              | 90 One-way ANOVA                   | Tukey's HSD test | <.0001  | 17.389349  | Sup 3j               | Wilcoxon-matched pairs signed rank two-tailed t test | 0.0917   | -0.03222  | Paired t test (Two-tailed)                   | 0.1573   | 0.002657  | 0.009122                | 1.415   | 752      |
|                |                                |                     | Symmetric    | 1              | 1                              | 90 One-way ANOVA                   | Tukey's HSD test | 0.00026 | 13.568063  | Sup 3j               |                                                      |          |           |                                              |          |           |                         |         |          |
|                |                                |                     | Asymmetric   | 2              | 2                              | 80 One-way ANOVA                   | Tukey's HSD test | 0.0088  | 6.9196991  | Sup 3j               |                                                      |          |           |                                              |          |           |                         |         |          |
| WT<br>Hoxb8 KO | WT vs KO Postsynaptic diameter | Striatum            | Asymmetric   | 1              | 1                              | 90 One-way ANOVA                   | Tukey's HSD test | 0.75335 | 0.09883485 | Sup 3m               | Wilcoxon-matched pairs signed rank two-tailed t test | < 0.0001 | 0.2287    | Paired t test (Two-tailed)                   | < 0.0001 | 0.1112    | 0.2446                  | 9.372   | 702      |
|                |                                |                     | Symmetric    | 1              | 1                              | 90 One-way ANOVA                   | Tukey's HSD test | <.0001  | 190.01098  | Sup 3m               |                                                      |          |           |                                              |          |           |                         |         |          |
|                |                                |                     | Asymmetric   | 2              | 2                              | 80 One-way ANOVA                   | Tukey's HSD test | <.0001  | 41.645299  | Sup 3m               |                                                      |          |           |                                              |          |           |                         |         |          |
| WT<br>Hoxb8 KO | WT vs KO Postsynaptic diameter | Striatum            | Asymmetric   | 1              | 1                              | 90 One-way ANOVA                   | Tukey's HSD test | 0.4264  | 0.63357345 | Sup 3m               | Wilcoxon-matched pairs signed rank two-tailed t test | < 0.0001 | -0.02691  | Paired t test (Two-tailed)                   | < 0.0001 | 0.03063   | -0.01382                | 4.874   | 752      |
|                |                                |                     | Symmetric    | 1              | 1                              | 90 One-way ANOVA                   | Tukey's HSD test | 0.01301 | 6.2136541  | Sup 3m               |                                                      |          |           |                                              |          |           |                         |         |          |
|                |                                |                     | Asymmetric   | 2              | 2                              | 80 One-way ANOVA                   | Tukey's HSD test | <.0001  | 56.874578  | Sup 3m               |                                                      |          |           |                                              |          |           |                         |         |          |
| WT<br>Hoxb8 KO | WT vs KO PSD length            | Frontal cortex      | Asymmetric   | 1              | 1                              | 90 One-way ANOVA                   | Tukey's HSD test | <.0001  | 36.668902  | Fig. 1o              | Wilcoxon-matched pairs signed rank two-tailed t test | < 0.0001 | 0.0001405 | Paired t test (Two-tailed)                   | < 0.0001 | 0.1133    | 0.02945                 | 9.804   | 752      |
|                |                                |                     | Symmetric    | 1              | 1                              | 90 One-way ANOVA                   | Tukey's HSD test | <.0001  | 82.125239  | Fig. 1o              |                                                      |          |           |                                              |          |           |                         |         |          |
|                |                                |                     | Asymmetric   | 2              | 2                              | 80 One-way ANOVA                   | Tukey's HSD test | 0.02656 | 4.9500146  | Fig. 1o              |                                                      |          |           |                                              |          |           |                         |         |          |
| WT<br>Hoxb8 KO | WT vs KO PSD length            | Frontal cortex      | Asymmetric   | 1              | 1                              | 90 One-way ANOVA                   | Tukey's HSD test | 0.04343 | 4.0980626  | Fig. 1o              | Wilcoxon-matched pairs signed rank two-tailed t test | < 0.0001 | 0.02837   | Paired t test (Two-tailed)                   | < 0.0001 | 0.06685   | 0.003541                | 7.34    | 752      |
|                |                                |                     | Symmetric    | 1              | 1                              | 90 One-way ANOVA                   | Tukey's HSD test | <.0001  | 130.33212  | Fig. 1o              |                                                      |          |           |                                              |          |           |                         |         |          |
|                |                                |                     | Asymmetric   | 2              | 2                              | 80 One-way ANOVA                   | Tukey's HSD test | 0.21351 | 1.5515854  | Fig. 1o              |                                                      |          |           |                                              |          |           |                         |         |          |
| WT<br>Hoxb8 KO | WT vs KO PSD length            | Striatum            | Asymmetric   | 1              | 1                              | 90 One-way ANOVA                   | Tukey's HSD test | <.0001  | 24.230351  | Fig. 1p              | Wilcoxon-matched pairs signed rank two-tailed t test | <.0001   | -0.08443  | Paired t test (Two-tailed)                   | < 0.0001 | 0.02841   | -0.008984               | 4.689   | 752      |
|                |                                |                     | Symmetric    | 1              | 1                              | 90 One-way ANOVA                   | Tukey's HSD test | <.0001  | 160.7466   | Fig. 1p              |                                                      |          |           |                                              |          |           |                         |         |          |
|                |                                |                     | Asymmetric   | 2              | 2                              | 80 One-way ANOVA                   | Tukey's HSD test | <.0001  | 39.286084  | Fig. 1p              |                                                      |          |           |                                              |          |           |                         |         |          |
| WT<br>Hoxb8 KO | WT vs KO PSD length            | Striatum            | Asymmetric   | 1              | 1                              | 90 One-way ANOVA                   | Tukey's HSD test | 0.28146 | 0.76723656 | Fig. 1p              | Wilcoxon-matched pairs signed rank two-tailed t test | 0.0002   | -0.1568   | Paired t test (Two-tailed)                   | < 0.0001 | 0.02083   | -0.136                  | 4       | 751      |
|                |                                |                     | Symmetric    | 1              | 1                              | 90 One-way ANOVA                   | Tukey's HSD test | <.0001  | 17.246183  | Fig. 1p              |                                                      |          |           |                                              |          |           |                         |         |          |
|                |                                |                     | Asymmetric   | 2              | 2                              | 80 One-way ANOVA                   | Tukey's HSD test | <.0001  | 137.96759  | Fig. 1p              |                                                      |          |           |                                              |          |           |                         |         |          |
| WT<br>Hoxb8 KO | WT vs KO PSD thickness         | Frontal cortex      | Asymmetric   | 1              | 1                              | 90 One-way ANOVA                   | Tukey's HSD test | 0.01296 | 6.215331   | Fig. 1q              | Wilcoxon-matched pairs signed rank two-tailed t test | < 0.0001 | 0.1255    | Paired t test (Two-tailed)                   | < 0.0001 | 0.2428    | 0.06694                 | 15.53   | 752      |
|                |                                |                     | Symmetric    | 1              | 1                              | 90 One-way ANOVA                   | Tukey's HSD test | <.0001  | 133.65279  | Fig. 1q              |                                                      |          |           |                                              |          |           |                         |         |          |
|                |                                |                     | Asymmetric   | 2              | 2                              | 80 One-way ANOVA                   | Tukey's HSD test | <.0001  | 278.80701  | Fig. 1q              |                                                      |          |           |                                              |          |           |                         |         |          |
| WT<br>Hoxb8 KO | WT vs KO PSD thickness         | Frontal cortex      | Asymmetric   | 1              | 1                              | 90 One-way ANOVA                   | Tukey's HSD test | <.0001  | 32.09493   | Fig. 1q              | Wilcoxon-matched pairs signed rank two-tailed t test | < 0.0001 | 0.2487    | Paired t test (Two-tailed)                   | 0.0078   | 0.009383  | 0.1832                  | 2.669   | 752      |
|                |                                |                     | Symmetric    | 1              | 1                              | 90 One-way ANOVA                   | Tukey's HSD test | <.0001  | 24.515411  | Fig. 1q              |                                                      |          |           |                                              |          |           |                         |         |          |
|                |                                |                     | Asymmetric   | 2              | 2                              | 80 One-way ANOVA                   | Tukey's HSD test | <.0001  | 42.866119  | Fig. 1q              |                                                      |          |           |                                              |          |           |                         |         |          |
