# Supplementary material
Source: PubMed Central journal article supplement (PMC5970001)
Supplement: NIHMS889964-supplement-11.pdf [file NIHMS889964-supplement-11.pdf]

Behavioral parameters for WT and *Hoxb8* mutant mice from Laboras experiments

## Male/Female

| Age (mths)  | Behavioral Paradigm  | Genotype and 'n'        |                          | P value   | Statistical test                          |
|-------------|----------------------|-------------------------|--------------------------|-----------|-------------------------------------------|
|             |                      | WT (n=79)<br>Mean ± SEM | KO (n=133)<br>Mean ± SEM |           |                                           |
| 4-12 months | Undefined duration   | 20726 ± 364             | 20812 ± 326              | 0.984     | One-way ANOVA<br><br>Tukey's posthoc test |
|             | Climb duration       | 8031 ± 485              | 5595 ± 366               | 0.0001 *  |                                           |
|             | Locomotion duration  | 2551 ± 100              | 2120 ± 63.8              | 0.0017 *  |                                           |
|             | Immobility duration  | 43801 ± 483             | 42159 ± 395              | 0.0288 *  |                                           |
|             | Grooming duration    | 7431 ± 286              | 10949 ± 309              | <0.0001 * |                                           |
|             | Drinking duration    | 338 ± 19.6              | 377 ± 19.1               | 0.4649    |                                           |
|             | Eating duration      | 3518 ± 180              | 4385 ± 171               | 0.0025 *  |                                           |
|             | Undefined frequency  | 5911 ± 144              | 5801 ± 103               | 0.811     |                                           |
|             | Climbing frequency   | 379 ± 29.4              | 207 ± 13.6               | <0.0001 * |                                           |
|             | Locomotion frequency | 3909 ± 142              | 3811 ± 93.2              | 0.8277    |                                           |
|             | Immobility frequency | 1304 ± 40.7             | 1453 ± 55.7              | 0.1232    |                                           |
|             | Grooming frequency   | 969 ± 35                | 1181 ± 34.6              | <0.0001 * |                                           |
|             | Drinking frequency   | 83.5 ± 4.35             | 83.5 ± 3.58              | 1         |                                           |
|             | Eating frequency     | 844.7 ± 42.4            | 1118 ± 45.3              | <0.0001 * |                                           |
|             | Total frequency      | 13401 ± 317.4           | 13653 ± 223              | 0.7843    |                                           |
|             | Maximum speed        | 278 ± 3.97              | 275 ± 3.15               | 0.7816    |                                           |
|             | Total speed maximum  | 32821 ± 1967            | 29638 ± 1399             | 0.3812    |                                           |
|             | Speed LAVG           | 80 ± 0.400              | 79.1 ± 0.303             | 0.2291    |                                           |
|             | Speed average        | 1.785 ± 0.0655          | 1.60 ± 0.042             | 0.0375 *  |                                           |
|             | Distance             | 154 ± 5.66              | 138 ± 3.606              | 0.0375 *  |                                           |

## Female

| Age (mths)  | Behavioral Paradigm  | Genotype and 'n'        |                         | P value   | Statistical test                          |
|-------------|----------------------|-------------------------|-------------------------|-----------|-------------------------------------------|
|             |                      | WT (n=49)<br>Mean ± SEM | KO (n=69)<br>Mean ± SEM |           |                                           |
| 4-12 months | Undefined duration   | 19834 ± 410             | 19778 ± 443             | 0.9961    | One-way ANOVA<br><br>Tukey's posthoc test |
|             | Climb duration       | 9676 ± 521              | 6993 ± 546              | 0.0033 *  |                                           |
|             | Locomotion duration  | 2649 ± 142              | 2170 ± 97.9             | 0.0317 *  |                                           |
|             | Immobility duration  | 42104 ± 554             | 40969 ± 588             | 0.4138    |                                           |
|             | Grooming duration    | 8329 ± 335              | 11719 ± 490             | <0.0001 * |                                           |
|             | Drinking duration    | 346 ± 22.8              | 352 ± 26                | 0.985     |                                           |
|             | Eating duration      | 3461 ± 214              | 4417 ± 274              | 0.0379 *  |                                           |
|             | Undefined frequency  | 5905 ± 194              | 5657 ± 457              | 0.6194    |                                           |
|             | Climbing frequency   | 422 ± 31.9              | 240 ± 22.3              | <0.0001 * |                                           |
|             | Locomotion frequency | 3906 ± 192              | 3672 ± 138              | 0.6168    |                                           |
|             | Immobility frequency | 1218 ± 44.3             | 1420 ± 88.7             | 0.1644    |                                           |
|             | Grooming frequency   | 1049 ± 43               | 1224 ± 51.8             | 0.0447 *  |                                           |
|             | Drinking frequency   | 91.6 ± 5.31             | 82.9 ± 5.39             | 0.5272    |                                           |
|             | Eating frequency     | 862.4 ± 47.8            | 1149 ± 70.3             | 0.0051 *  |                                           |
|             | Total frequency      | 13454 ± 424             | 13445 ± 348             | 0.999     |                                           |
|             | Maximum speed        | 270 ± 4.12              | 277 ± 4.72              | 0.5022    |                                           |
|             | Total speed maximum  | 33873 ± 2763            | 30870 ± 2097            | 0.6588    |                                           |
|             | Speed LAVG           | 80.6 ± 0.519            | 80.1 ± 0.464            | 0.8408    |                                           |
|             | Speed average        | 1.85 ± 0.092            | 1.614 ± 0.068           | 0.117     |                                           |
|             | Distance             | 159.8 ± 7.92            | 139.5 ± 5.85            | 0.117     |                                           |

## Male

| Age (mths)  | Behavioral Paradigm  | Genotype and 'n'        |                         | P value   | Statistical test                          |
|-------------|----------------------|-------------------------|-------------------------|-----------|-------------------------------------------|
|             |                      | WT (n=30)<br>Mean ± SEM | KO (n=64)<br>Mean ± SEM |           |                                           |
| 4-12 months | Undefined duration   | 20726 ± 364             | 20813 ± 326             | 0.9385    | One-way ANOVA<br><br>Tukey's posthoc test |
|             | Climb duration       | 8032 ± 485              | 5595 ± 366              | 0.1893    |                                           |
|             | Locomotion duration  | 2551 ± 100.4            | 2120 ± 63.8             | 0.1026    |                                           |
|             | Immobility duration  | 43801 ± 483             | 42159 ± 395             | 0.0002 *  |                                           |
|             | Grooming duration    | 7432 ± 286              | 10949 ± 309             | <0.0001 * |                                           |
|             | Drinking duration    | 338 ± 19.6              | 377 ± 19.1              | 0.316     |                                           |
|             | Eating duration      | 3519 ± 180              | 4385 ± 171              | 0.0807    |                                           |
|             | Undefined frequency  | 5911 ± 144              | 5801 ± 103.5            | 0.9888    |                                           |
|             | Climbing frequency   | 379 ± 29.4              | 207 ± 13.6              | 0.0019 *  |                                           |
|             | Locomotion frequency | 3909 ± 142              | 3811 ± 93.2             | 0.9774    |                                           |
|             | Immobility frequency | 1304 ± 40.7             | 1453 ± 55.7             | 0.906     |                                           |
|             | Grooming frequency   | 969 ± 35.1              | 1181 ± 34.6             | <0.0001 * |                                           |
|             | Drinking frequency   | 83.5 ± 4.35             | 83.5 ± 3.58             | 0.5259    |                                           |
|             | Eating frequency     | 844.7 ± 42.4            | 1118 ± 45.25            | 0.0079 *  |                                           |
|             | Total frequency      | 13400 ± 317             | 13653 ± 223             | 0.5107    |                                           |
|             | Maximum speed        | 278.2 ± 3.97            | 275 ± 3.15              | 0.0548    |                                           |
|             | Total speed maximum  | 32821 ± 1967            | 29637 ± 1399            | 0.6878    |                                           |
|             | Speed LAVG           | 80 ± 0.400              | 79.1 ± 0.303            | 0.3188    |                                           |
|             | Speed average        | 1.79 ± 0.065            | 1.596 ± 0.0417          | 0.5082    |                                           |
|             | Distance             | 154.2 ± 5.66            | 137.9 ± 3.606           | 0.5082    |                                           |
